# Supplementary material for: Profiling the Functional Diversity of Termite Mound Soil Bacteria as Revealed by Shotgun Sequencing
Source: PubMed Central journal article supplement (PMC6770954; doi:10.3390/genes10090637), 2019-08-23
Supplement: genes-10-00637-s001.pdf [file genes-10-00637-s001.pdf]

# Profiling the functional diversity of termite mound soil bacteria as revealed by shotgun sequencing

Ben Jesuorsemwon Enagbonma, Bukola Rhoda Aremu and Olubukola Oluranti Babalola

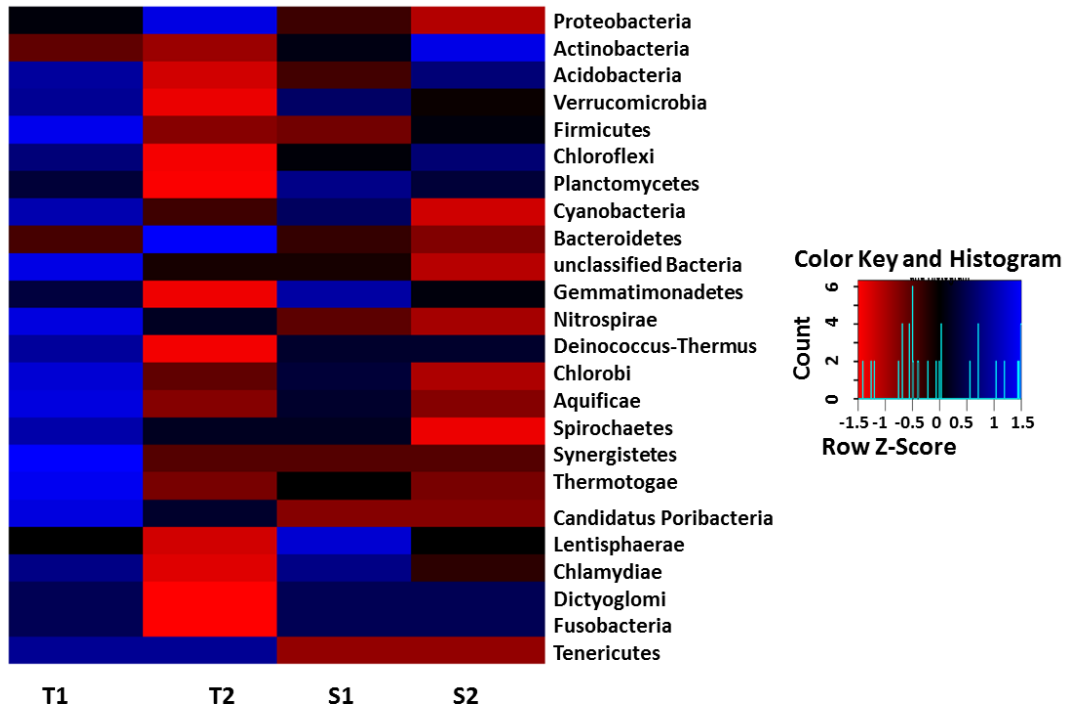

Figure S1: Heatmap of bacterial phyla in termite mound soils and their corresponding surrounding soil samples.

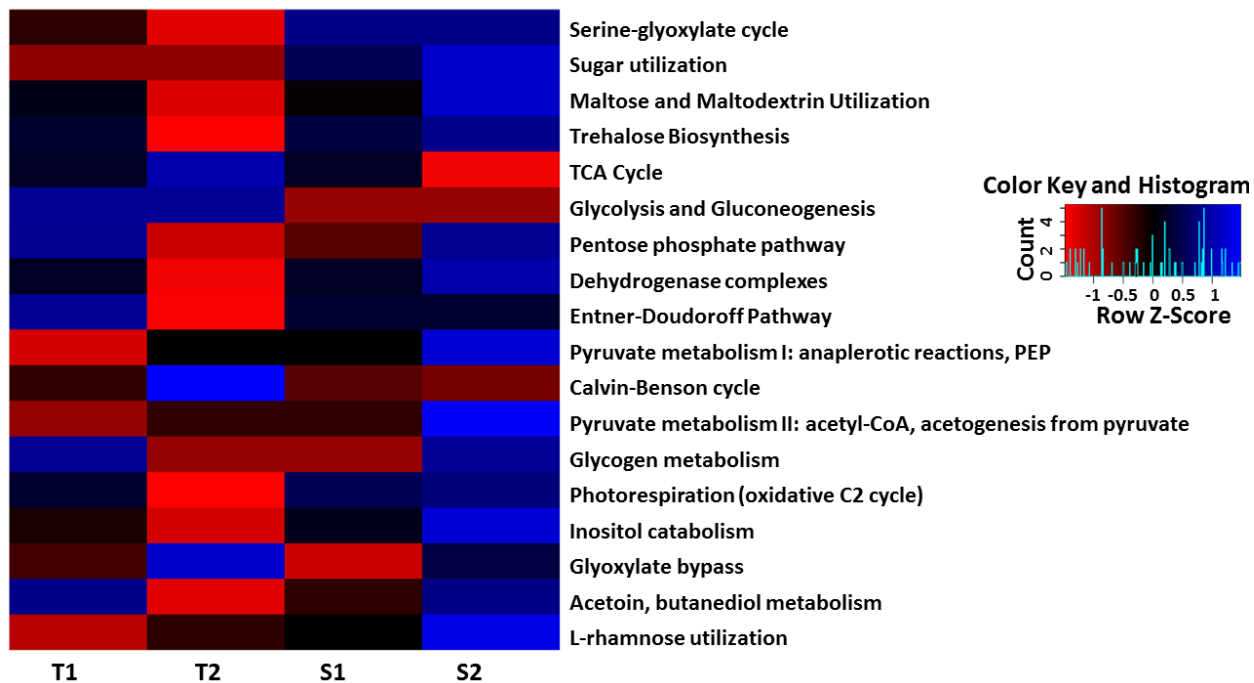

Figure S2A: relative abundance of pathways involved in carbohydrate metabolism in both soil samples.

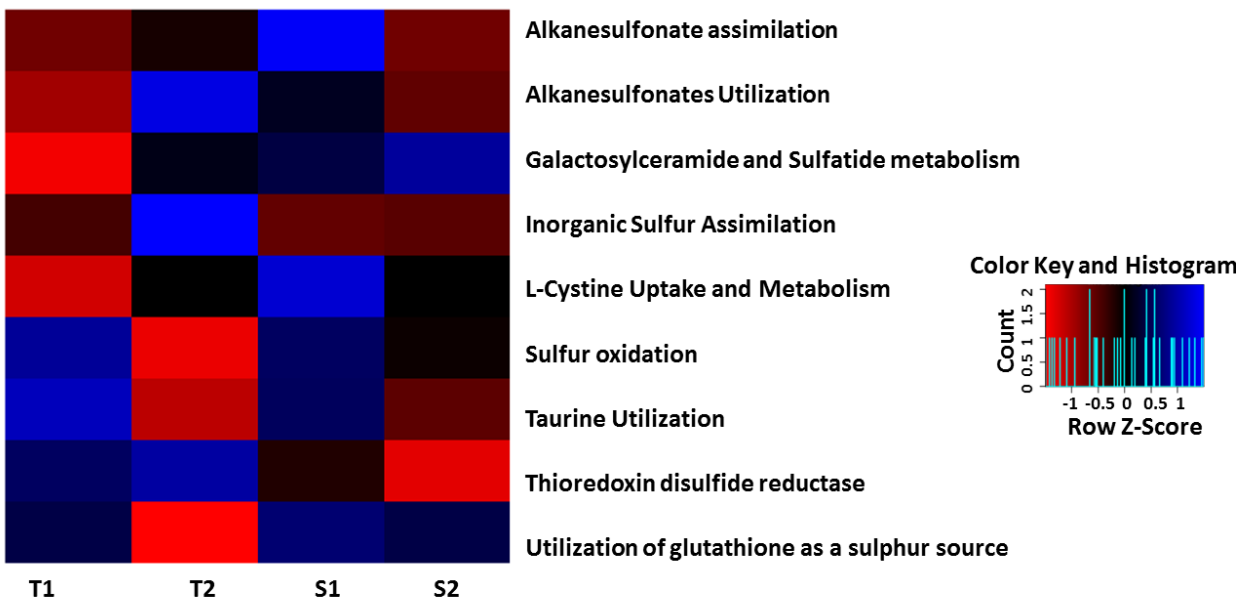

Figure S2B: relative abundance of pathways involved in sulphur metabolism in both samples.

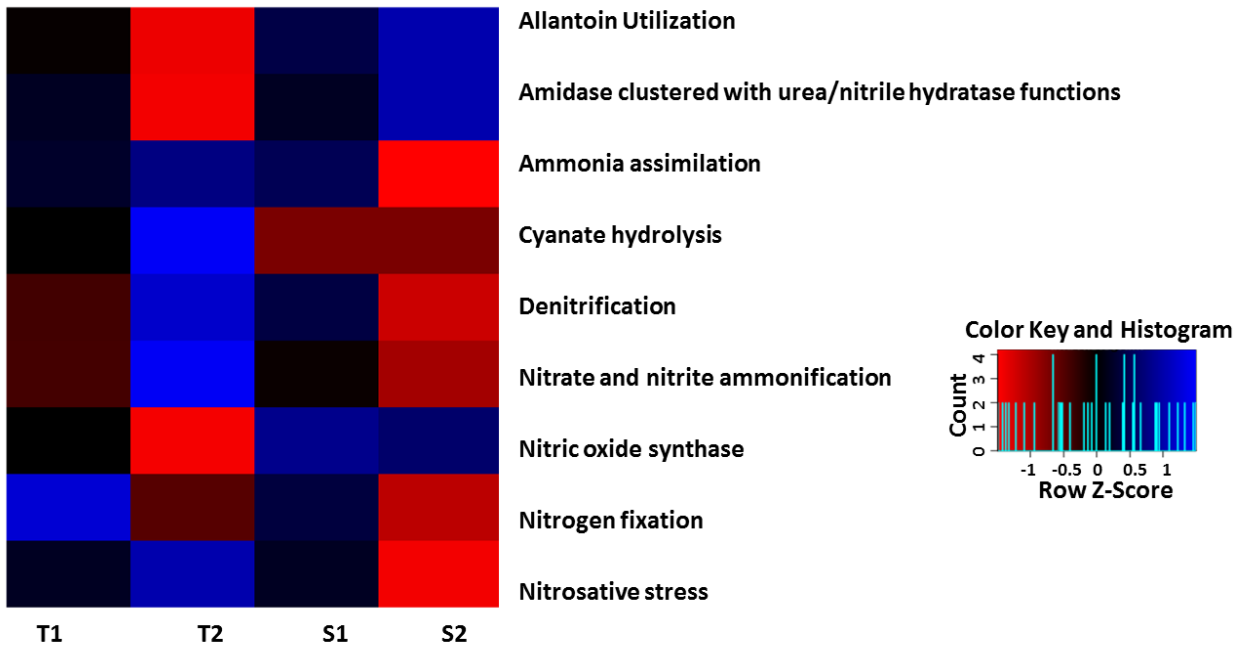

Figure S2C: relative abundance of pathways involved in nitrogen metabolism in both samples.

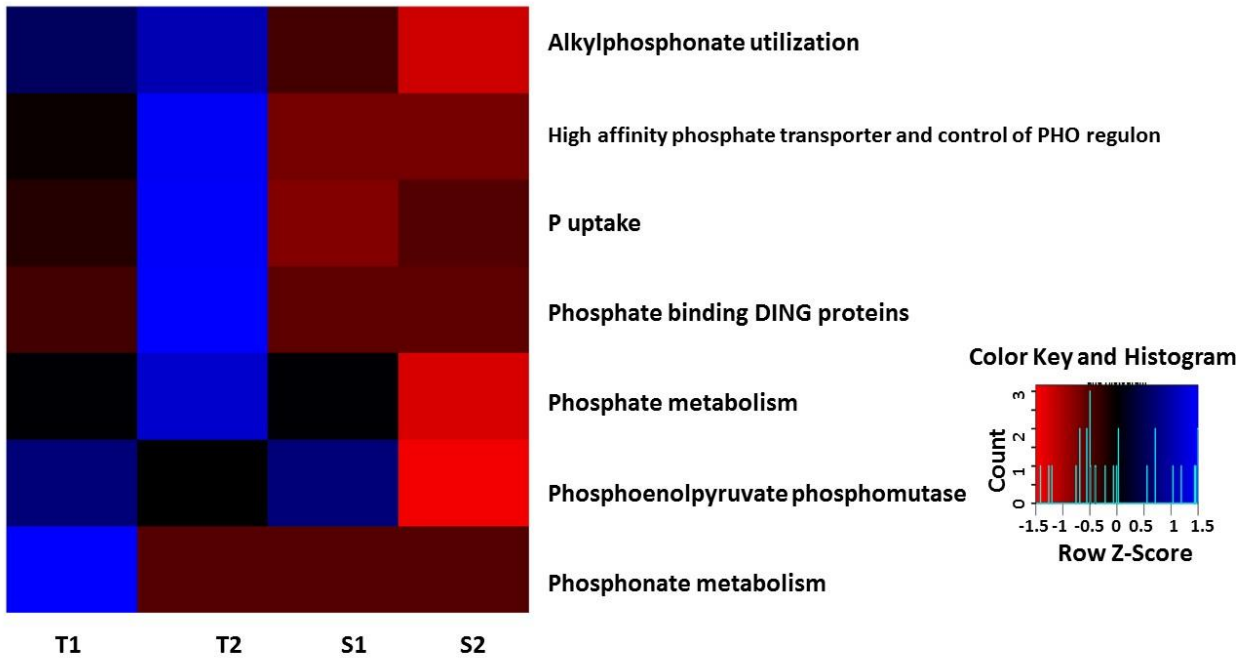

Figure S2D: relative abundance of pathways involved in phosphorus metabolism in both samples

Table S1: Mean percentage of sequences similar to major metabolisms in termite mound soils and the surrounding soils

| Functional categories based SEED level 1           | T1            | T2            | S1            | S2            | P-value |
|----------------------------------------------------|---------------|---------------|---------------|---------------|---------|
| Amino Acids and Derivatives                        | 10.31 ± 0.16a | 10.38 ± 0.04a | 10.55 ± 0.19a | 10.61 ± 0.10b | 0.03    |
| Carbohydrates                                      | 13.93 ± 0.23a | 13.72 ± 0.26a | 14.25 ± 0.16b | 14.82 ± 0.27c | 0.01    |
| Cell Division and Cell Cycle                       | 0.94 ± 0.03a  | 0.92 ± 0.03a  | 0.93 ± 0.04a  | 0.92 ± 0.01a  | 0.73    |
| Cell Wall and Capsule                              | 3.49 ± 0.08a  | 3.44 ± 0.17a  | 3.48 ± 0.12a  | 3.32 ± 0.03a  | 0.12    |
| Clustering-based subsystems                        | 13.13 ± 0.10a | 13.09 ± 0.03a | 13.12 ± 0.10a | 13.21 ± 0.09a | 0.24    |
| Cofactors, Vitamins, Prosthetic Groups, Pigments   | 5.98 ± 0.12a  | 5.81 ± 0.22a  | 6.00 ± 0.07a  | 6.08 ± 0.10a  | 0.28    |
| DNA Metabolism                                     | 4.50 ± 0.13a  | 4.66 ± 0.14a  | 4.55 ± 0.10a  | 4.50 ± 0.12a  | 0.46    |
| Dormancy and Sporulation                           | 0.14 ± 0.01a  | 0.18 ± 0.02b  | 0.15 ± 0.01a  | 0.17 ± 0.03a  | 0.03    |
| Fatty Acids, Lipids, and Isoprenoids               | 2.65 ± 0.07a  | 2.52 ± 0.09a  | 2.71 ± 0.03b  | 2.76 ± 0.04c  | 0.01    |
| Iron acquisition and metabolism                    | 0.59 ± 0.11a  | 0.91 ± 0.17b  | 0.58 ± 0.05c  | 0.51 ± 0.04d  | 0.02    |
| Membrane Transport                                 | 3.89 ± 0.27a  | 3.59 ± 0.21a  | 3.73 ± 0.08a  | 3.47 ± 0.03b  | 0.01    |
| Metabolism of Aromatic Compounds                   | 1.76 ± 0.07a  | 1.69 ± 0.10a  | 1.88 ± 0.08b  | 1.91 ± 0.02c  | 0.01    |
| Miscellaneous                                      | 6.51 ± 0.03a  | 6.31 ± 0.03b  | 6.45 ± 0.08c  | 6.54 ± 0.08d  | 0.02    |
| Motility and Chemotaxis                            | 0.71 ± 0.08a  | 0.41 ± 0.06b  | 0.86 ± 0.11c  | 0.82 ± 0.07d  | 0.01    |
| Nitrogen Metabolism                                | 1.29 ± 0.78a  | 1.31 ± 0.06a  | 1.33 ± 0.08a  | 1.26 ± 0.03a  | 0.39    |
| Nucleosides and Nucleotides                        | 3.35 ± 0.02a  | 3.23 ± 0.15a  | 3.37 ± 0.04a  | 3.35 ± 0.03a  | 0.45    |
| Phages, Prophages, Transposable elements, Plasmids | 0.97 ± 0.04a  | 1.34 ± 0.28b  | 0.86 ± 0.04b  | 0.93 ± 0.03d  | 0.01    |
| Phosphorus Metabolism                              | 1.34 ± 0.02a  | 1.53 ± 0.05b  | 1.28 ± 0.06c  | 1.24 ± 0.02d  | 0.01    |
| Photosynthesis                                     | 0.09 ± 0.01a  | 0.08 ± 0.01a  | 0.09 ± 0.01b  | 0.11 ± 0.01c  | 0.01    |
| Potassium metabolism                               | 0.47 ± 0.04a  | 0.45 ± 0.04a  | 0.45 ± 0.05a  | 0.38 ± 0.03a  | 0.09    |
| Protein Metabolism                                 | 8.32 ± 0.11a  | 8.59 ± 0.12b  | 8.21 ± 0.13b  | 8.18 ± 0.08c  | 0.01    |
| RNA Metabolism                                     | 3.47 ± 0.10a  | 3.71 ± 0.03b  | 3.34 ± 0.09c  | 3.27 ± 0.04d  | 0.01    |
| Regulation and Cell signaling                      | 0.93 ± 0.02a  | 1.10 ± 0.06b  | 0.93 ± 0.01c  | 0.90 ± 0.01d  | 0.01    |
| Respiration                                        | 4.55 ± 0.14a  | 4.33 ± 0.06a  | 4.39 ± 0.02a  | 4.44 ± 0.12a  | 0.17    |
| Secondary Metabolism                               | 0.30 ± 0.01a  | 0.30 ± 0.01a  | 0.31 ± 0.01a  | 0.32 ± 0.01a  | 0.07    |
| Stress Response                                    | 2.40 ± 0.06a  | 2.52 ± 0.08a  | 2.48 ± 0.08a  | 2.48 ± 0.04a  | 0.12    |
| Sulfur Metabolism                                  | 0.98 ± 0.04a  | 1.04 ± 0.05a  | 0.99 ± 0.04a  | 0.97 ± 0.04a  | 0.24    |
| Virulence, Disease and Defense                     | 3.04 ± 0.20a  | 2.87 ± 0.16a  | 2.76 ± 0.17a  | 2.54 ± 0.17b  | 0.04    |

A) Mean  $\pm$  standard deviation (n= 4) .b) Different letters in a same row denote significant differences ( $P < 0.05$ ) by Tukey's pairwise significant difference test.
